# Supplementary material for: Caring for the Older Horse: A Conceptual Model of Owner Decision Making
Source: MDPI journal article supplement (doi:10.3390/ani11051309), 2021-05-01
Supplement: s1 [file s1]

Supplementary Material Table 1: Search terms relevant to the older horse used to search for discussion fora threads.

|              |                                                                                                                                                                                                              |
|--------------|--------------------------------------------------------------------------------------------------------------------------------------------------------------------------------------------------------------|
| Search terms | old horse, old horse care, geriatric horse, elderly horse, vaccination old horse, vaccinate old horse, PPID, cushing's, vet old horse, quality of life horse, retirement, retirement livery, retirement yard |
|--------------|--------------------------------------------------------------------------------------------------------------------------------------------------------------------------------------------------------------|
